# Supplementary material for: Detecting Selection on Temporal and Spatial Scales: A Genomic Time-Series Assessment of Selective Responses to Devil Facial Tumor Disease
Source: PubMed Central journal article supplement (PMC4773136; doi:10.1371/journal.pone.0147875), 2016-03-01
Supplement: pone.0147875.s001.pdf [file pone.0147875.s001.pdf]

**SI 1.** Estimates of genetic diversity for the Tasmanian devil based on 1482 SNPs. The statistics correspond to: number of individuals genotyped ( $N$ ), mean number of alleles per SNP ( $A$ ), number of private alleles ( $A_p$ ), observed heterozygosity ( $H_O$ ), and expected heterozygosity ( $H_E$ ). Presence and absence of devil facial tumor disease (DFTD) is indicated with plus and minus symbols, respectively.

| <b>Population</b> | <b>Year</b> | <b>DFTD</b> | <b><math>N</math></b> | <b><math>A</math></b> | <b><math>A_p</math></b> | <b><math>H_O</math></b> | <b><math>H_E</math></b> |
|-------------------|-------------|-------------|-----------------------|-----------------------|-------------------------|-------------------------|-------------------------|
| Woolnorth         | 2004        | -           | 27                    | 1.88                  | 11                      | 0.408                   | 0.315                   |
|                   | 2009        | -           | 27                    | 1.91                  | -                       | 0.408                   | 0.315                   |
|                   | 2013        | -           | 27                    | 1.93*                 | -                       | 0.425                   | 0.336                   |
| Arthur River      | 1999        | -           | 27                    | 1.94                  | 13                      | 0.425                   | 0.327                   |
|                   | 2009        | -           | 25                    | 1.93                  | -                       | 0.400                   | 0.326                   |
|                   | 2013        | -           | 24                    | 1.93                  | -                       | 0.393*                  | 0.317                   |
| Narawntapu        | 1999        | -           | 27                    | 1.98                  | 7                       | 0.439                   | 0.352                   |
|                   | 2004        | -           | 26                    | 1.97                  | -                       | 0.442                   | 0.351                   |
|                   | 2009        | +           | 30                    | 1.98                  | -                       | 0.450                   | 0.352                   |
|                   | 2013        | +           | 27                    | 1.97                  | 1                       | 0.440                   | 0.356                   |
| Mt William        | 2004        | +           | 27                    | 1.96                  | -                       | 0.426                   | 0.333                   |
|                   | 2009        | +           | 26                    | 1.95                  | -                       | 0.440                   | 0.344                   |
|                   | 2013        | +           | 27                    | 1.95                  | -                       | 0.404                   | 0.332                   |
| Freycinet         | 1999        | -           | 26                    | 1.96                  | 8                       | 0.452                   | 0.352                   |
|                   | 2004        | +           | 27                    | 1.96                  | -                       | 0.446                   | 0.345                   |
|                   | 2009        | +           | 27                    | 1.97                  | -                       | 0.439                   | 0.352                   |
|                   | 2013        | +           | 20                    | 1.94                  | 1                       | 0.434                   | 0.348                   |
| Forestier         | 2004        | -           | 26                    | 1.91                  | -                       | 0.443                   | 0.341                   |
|                   | 2009        | +           | 24                    | 1.94                  | -                       | 0.455                   | 0.348                   |
|                   | 2013        | +           | 26                    | 1.93                  | -                       | 0.393                   | 0.328                   |

Significant change over time is indicated with \* ( $P < 0.05$ ).
