# Supplementary material for: Detecting Selection on Temporal and Spatial Scales: A Genomic Time-Series Assessment of Selective Responses to Devil Facial Tumor Disease
Source: PubMed Central journal article supplement (PMC4773136; doi:10.1371/journal.pone.0147875), 2016-03-01
Supplement: pone.0147875.s002.pdf [file pone.0147875.s002.pdf]

**SI 2.** SNPs under selection at each year detected with BAYESCAN assuming prior odds of 10. For each SNP chromosome (chr.), super-contig, SNP position in super-contig and direction of selection, which for all SNPs are positive (P).

| <b>Chr.</b> | <b>Super-contig</b> | <b>SNP position</b> | <b>1999</b> | <b>2004</b> | <b>2009</b> | <b>2013</b> |
|-------------|---------------------|---------------------|-------------|-------------|-------------|-------------|
| 1           | 2                   | 960133              | -           | P           | P           | -           |
| 1           | 5                   | 3478545             | -           | P           | -           | P           |
| 1           | 12                  | 876195              | -           | P           | P           | -           |
| 1           | 24                  | 2439039             | -           | -           | -           | P           |
| 1           | 30                  | 456063              | -           | -           | -           | P           |
| 1           | 34                  | 1974145             | -           | -           | P           | -           |
| 1           | 34                  | 2090729             | -           | -           | P           | -           |
| 1           | 40                  | 2957400             | -           | -           | P           | P           |
| 1           | 50                  | 417458              | -           | -           | P           | P           |
| 1           | 54                  | 1481620             | -           | -           | -           | P           |
| 1           | 89                  | 1980127             | P           | P           | P           | -           |
| 1           | 103                 | 63790               | -           | -           | P           | P           |
| 1           | 107                 | 470615              | -           | -           | -           | P           |
| 1           | 109                 | 440318              | -           | -           | P           | -           |
| 1           | 109                 | 452958              | -           | -           | P           | -           |
| 1           | 124                 | 537278              | -           | -           | -           | P           |
| 1           | 130                 | 1460525             | -           | -           | P           | P           |
| 1           | 174                 | 250444              | -           | -           | -           | P           |
| 1           | 212                 | 560709              | -           | -           | P           | P           |
| 1           | 239                 | 83999               | -           | -           | -           | P           |
| 1           | 239                 | 2175315             | -           | -           | P           | P           |
| 1           | 259                 | 53959               | P           | -           | P           | P           |
| 1           | 259                 | 73417               | P           | -           | -           | P           |
| 1           | 259                 | 2775110             | P           | P           | P           | P           |
| 1           | 281                 | 786550              | P           | P           | -           | P           |
| 1           | 281                 | 1194959             | P           | P           | -           | P           |
| 1           | 289                 | 1692290             | P           | P           | P           | P           |
| 1           | 297                 | 1446547             | -           | -           | -           | P           |
| 1           | 354                 | 2358931             | -           | -           | -           | P           |
| 1           | 375                 | 696764              | -           | -           | P           | P           |
| 1           | 381                 | 278795              | -           | -           | -           | P           |
| 1           | 386                 | 537974              | -           | -           | P           | P           |
| 1           | 397                 | 80203               | -           | -           | P           | P           |
| 1           | 445                 | 71025               | -           | P           | P           | P           |
| 1           | 445                 | 75680               | -           | P           | P           | P           |
| 1           | 446                 | 132042              | -           | -           | -           | P           |
| 1           | 446                 | 133260              | -           | -           | -           | P           |
| 1           | 630                 | 3069                | P           | P           | P           | P           |
| 1           | 643                 | 103647              | -           | P           | P           | P           |
| 1           | 788                 | 56371               | -           | -           | -           | P           |
| 1           | 1074                | 6834                | -           | -           | -           | P           |
| 1           | 1079                | 4982                | -           | -           | P           | P           |
| 1           | 1246                | 33567               | -           | -           | P           | P           |
| 1           | 1301                | 46853               | -           | -           | -           | P           |
| 1           | 1370                | 3906                | -           | -           | P           | P           |
| 1           | 1431                | 18549               | -           | P           | -           | -           |
| 1           | 1503                | 12070               | -           | -           | P           | -           |
| 1           | 3080                | 6092                | -           | -           | P           | -           |
| 1           | 5302                | 2045                | -           | -           | P           | P           |
| 2           | 13                  | 8347                | -           | P           | P           | P           |
| 2           | 67                  | 673351              | -           | -           | P           | -           |
| 2           | 117                 | 748966              | -           | -           | -           | P           |
| 2           | 122                 | 525086              | -           | -           | P           | -           |

|   |      |         |   |   |   |   |
|---|------|---------|---|---|---|---|
| 2 | 154  | 3701007 | - | - | P | P |
| 2 | 185  | 258819  | - | - | P | - |
| 2 | 223  | 552281  | - | - | - | P |
| 2 | 231  | 725912  | - | - | - | P |
| 2 | 233  | 676222  | - | - | P | - |
| 2 | 235  | 2941774 | - | - | P | P |
| 2 | 241  | 412933  | - | P | P | P |
| 2 | 253  | 2410314 | - | - | P | P |
| 2 | 254  | 173178  | - | - | P | P |
| 2 | 256  | 209544  | - | - | P | - |
| 2 | 279  | 1962190 | P | - | - | - |
| 2 | 310  | 225423  | - | P | - | - |
| 2 | 310  | 2192602 | - | - | P | - |
| 2 | 313  | 1149368 | - | - | P | - |
| 2 | 382  | 421209  | - | - | P | P |
| 2 | 445  | 3244531 | - | - | P | P |
| 2 | 447  | 35597   | - | - | P | - |
| 2 | 447  | 167640  | - | - | P | - |
| 2 | 449  | 170227  | - | - | P | P |
| 2 | 451  | 570671  | - | - | P | - |
| 2 | 458  | 456749  | - | - | - | P |
| 2 | 462  | 195643  | - | - | P | P |
| 2 | 569  | 60916   | - | P | P | P |
| 2 | 658  | 62646   | - | - | P | P |
| 2 | 1150 | 21386   | - | - | - | P |
| 2 | 1421 | 58284   | - | - | P | P |
| 2 | 2426 | 18973   | - | - | P | - |
| 3 | 93   | 249731  | P | P | P | P |
| 3 | 94   | 718106  | P | P | P | P |
| 3 | 94   | 779170  | P | - | P | P |
| 3 | 109  | 1314065 | - | P | P | P |
| 3 | 109  | 1363279 | - | P | - | - |
| 3 | 137  | 836212  | - | - | P | - |
| 3 | 184  | 863591  | - | - | P | P |
| 3 | 195  | 3570500 | - | - | P | - |
| 3 | 243  | 2485658 | - | - | P | - |
| 3 | 245  | 93639   | - | - | P | P |
| 3 | 260  | 2537254 | - | - | P | - |
| 3 | 268  | 1240699 | - | - | P | - |
| 3 | 310  | 1770399 | - | - | P | P |
| 3 | 314  | 2784883 | - | - | P | - |
| 3 | 320  | 3690596 | P | - | - | - |
| 3 | 330  | 833277  | - | - | P | - |
| 3 | 342  | 355159  | - | - | P | - |
| 3 | 354  | 1712873 | - | - | P | P |
| 3 | 357  | 217434  | - | - | P | - |
| 3 | 377  | 2417877 | - | - | P | P |
| 3 | 381  | 4795550 | - | P | - | - |
| 3 | 387  | 2836116 | - | - | P | P |
| 3 | 388  | 1859272 | - | - | P | - |
| 3 | 388  | 3437445 | - | P | P | P |
| 3 | 390  | 2536138 | P | - | P | P |
| 3 | 450  | 160463  | - | P | - | - |
| 3 | 663  | 8767    | - | - | P | P |
| 3 | 760  | 37586   | P | P | P | P |
| 3 | 1425 | 53040   | - | - | P | - |
| 3 | 1483 | 4552    | - | - | P | - |
| 3 | 3680 | 908     | - | P | P | P |
| 3 | 7012 | 906     | - | - | P | - |
| 4 | 4    | 597847  | - | - | P | - |

|   |      |         |   |   |   |   |
|---|------|---------|---|---|---|---|
| 4 | 14   | 426490  | - | P | P | P |
| 4 | 15   | 1005633 | - | - | P | P |
| 4 | 15   | 1523425 | - | - | P | P |
| 4 | 17   | 3632032 | - | P | P | - |
| 4 | 23   | 331080  | - | - | - | P |
| 4 | 30   | 2804952 | - | - | P | - |
| 4 | 32   | 54662   | - | P | P | P |
| 4 | 60   | 1569690 | - | - | - | P |
| 4 | 61   | 345278  | - | P | P | P |
| 4 | 77   | 2113411 | - | P | P | P |
| 4 | 87   | 1670726 | - | - | P | P |
| 4 | 102  | 1524824 | - | P | - | - |
| 4 | 102  | 1561669 | - | - | P | - |
| 4 | 103  | 1119812 | - | - | P | - |
| 4 | 103  | 1133697 | - | P | P | - |
| 4 | 103  | 1139356 | - | - | - | P |
| 4 | 127  | 1864609 | P | - | - | - |
| 4 | 130  | 369461  | - | - | P | - |
| 4 | 155  | 685114  | - | - | - | P |
| 4 | 175  | 668147  | - | - | - | P |
| 4 | 181  | 101628  | - | P | P | - |
| 4 | 207  | 1303526 | - | - | P | P |
| 4 | 237  | 956702  | - | - | P | - |
| 4 | 250  | 2091405 | - | P | P | P |
| 4 | 251  | 828774  | - | P | - | - |
| 4 | 274  | 179109  | - | - | P | P |
| 4 | 276  | 1861899 | - | P | P | P |
| 4 | 281  | 706685  | - | - | P | - |
| 4 | 298  | 71438   | - | - | P | P |
| 4 | 302  | 548044  | - | P | P | P |
| 4 | 463  | 41732   | - | - | P | P |
| 4 | 657  | 33346   | - | - | P | P |
| 4 | 657  | 127489  | - | - | P | P |
| 4 | 887  | 27413   | - | P | - | - |
| 4 | 1078 | 47296   | - | - | - | P |
| 4 | 1129 | 37547   | - | P | - | - |
| 4 | 1135 | 20117   | - | - | - | P |
| 4 | 1826 | 196     | - | P | - | P |
| 4 | 1885 | 1624    | - | - | P | - |
| 5 | 10   | 76100   | P | - | P | P |
| 5 | 43   | 1194068 | - | - | P | - |
| 5 | 50   | 1376047 | - | - | - | P |
| 5 | 55   | 1312293 | - | - | P | P |
| 5 | 63   | 1205307 | - | - | - | P |
| 5 | 68   | 250972  | - | P | P | P |
| 5 | 82   | 124066  | - | P | P | P |
| 5 | 82   | 1023371 | - | - | - | P |
| 5 | 85   | 2268240 | - | - | P | - |
| 5 | 119  | 4088160 | - | - | P | - |
| 5 | 157  | 1444854 | - | P | P | P |
| 5 | 170  | 2852763 | - | - | P | P |
| 5 | 175  | 242072  | - | - | P | P |
| 5 | 182  | 227713  | - | P | P | P |
| 5 | 368  | 180120  | - | - | P | - |
| 5 | 374  | 40069   | - | - | P | P |
| 5 | 379  | 97233   | - | - | P | P |
| 5 | 447  | 7205    | - | - | P | P |
| 5 | 460  | 53554   | - | - | P | P |
| 5 | 464  | 46402   | - | - | P | - |
| 5 | 523  | 19999   | - | - | - | P |

|    |     |         |   |   |   |   |
|----|-----|---------|---|---|---|---|
| 5  | 625 | 3774    | P | P | P | P |
| 5  | 632 | 10345   | - | P | P | - |
| 6  | 41  | 225810  | - | - | - | P |
| 6  | 82  | 187751  | - | - | P | P |
| 6  | 83  | 554595  | - | P | - | - |
| 6  | 94  | 165143  | - | - | P | P |
| 6  | 106 | 775062  | - | - | - | P |
| 6  | 121 | 808041  | - | - | P | P |
| 6  | 140 | 3332564 | - | - | P | - |
| 6  | 145 | 2409985 | - | P | - | P |
| 6  | 155 | 209370  | - | P | - | - |
| 6  | 156 | 2519435 | - | - | P | P |
| 6  | 161 | 1965251 | - | - | P | P |
| 6  | 167 | 3269766 | - | - | P | P |
| 6  | 168 | 299080  | - | P | - | - |
| 6  | 168 | 390402  | - | - | P | P |
| 6  | 191 | 49380   | - | - | - | P |
| 6  | 313 | 113496  | - | - | - | P |
| 6  | 425 | 5868    | - | - | P | - |
| 6  | 728 | 9316    | - | - | P | - |
| NA | 0   | 2       | P | P | P | P |
| NA | 0   | 4       | - | P | - | - |
| NA | 0   | 12      | P | - | - | - |
| NA | 0   | 18      | - | P | P | P |
| NA | 0   | 34      | - | - | P | - |
| NA | 0   | 47      | - | P | - | - |
| NA | 0   | 91      | - | - | P | P |
