# Supplementary material for: Detecting Selection on Temporal and Spatial Scales: A Genomic Time-Series Assessment of Selective Responses to Devil Facial Tumor Disease
Source: PubMed Central journal article supplement (PMC4773136; doi:10.1371/journal.pone.0147875), 2016-03-01
Supplement: pone.0147875.s003.pdf [file pone.0147875.s003.pdf]

**SI 3.** SNPs under selection in individual Tasmanian devil population detected with WFABC assuming a) a small ( $N_e=50$ ) and b) a large ( $N_e=500$ ) effective population size. For each SNP chromosome (Chr.), super-contig and position in super-contig are given. Direction of selection is given as positive (P) or negative (N).

|    | Chr. | Super-contig | SNP position | Arthur River | Woolnorth | Narawntapu | Mt William | Freycinet | Forestier |
|----|------|--------------|--------------|--------------|-----------|------------|------------|-----------|-----------|
| a) | 1    | 301          | 3268273      | -            | -         | -          | -          | P         | -         |
|    | 1    | 301          | 3286057      | -            | -         | -          | -          | P         | -         |
|    | 2    | 42           | 2706312      | -            | -         | -          | -          | -         | P         |
|    | 2    | 67           | 673351       | -            | -         | N          | -          | -         | N         |
|    | 2    | 333          | 1747729      | P            | -         | -          | -          | -         | -         |
|    | 2    | 334          | 978337       | -            | -         | -          | P          | -         | -         |
|    | 2    | 343          | 1707547      | -            | -         | -          | P          | -         | -         |
|    | 3    | 35           | 1680796      | -            | -         | -          | -          | P         | -         |
|    | 3    | 104          | 4367326      | -            | -         | -          | -          | P         | -         |
|    | 3    | 126          | 2077698      | -            | P         | -          | -          | -         | -         |
|    | 3    | 357          | 217434       | -            | P         | -          | -          | -         | -         |
|    | 3    | 1483         | 4552         | N            | -         | -          | -          | -         | -         |
|    | 4    | 127          | 1864609      | -            | -         | -          | -          | P         | -         |
|    | 5    | 43           | 1194068      | -            | -         | -          | P          | -         | -         |
|    | 5    | 507          | 10806        | -            | -         | -          | -          | N         | -         |
|    | 6    | 130          | 148254       | -            | -         | -          | -          | -         | N         |
|    | 6    | 158          | 1961285      | -            | -         | -          | -          | -         | N         |
| b) | 1    | 2            | 960133       | -            | -         | -          | P          | -         | -         |
|    | 1    | 4            | 146619       | N            | -         | -          | -          | -         | -         |
|    | 1    | 5            | 3478545      | -            | -         | -          | P          | -         | P         |
|    | 1    | 11           | 2400455      | -            | -         | -          | P          | -         | -         |
|    | 1    | 12           | 876195       | N            | -         | -          | -          | -         | -         |
|    | 1    | 14           | 70407        | -            | -         | -          | -          | -         | P         |
|    | 1    | 24           | 1707150      | -            | -         | -          | P          | N         | -         |
|    | 1    | 31           | 111314       | P            | -         | N          | -          | -         | -         |
|    | 1    | 34           | 2090729      | -            | -         | -          | N          | -         | -         |
|    | 1    | 34           | 2451414      | -            | -         | P          | -          | -         | -         |
|    | 1    | 40           | 649982       | -            | -         | -          | -          | -         | N         |
|    | 1    | 40           | 3849632      | P            | -         | -          | -          | -         | -         |
|    | 1    | 49           | 312113       | -            | -         | -          | N          | -         | -         |
|    | 1    | 51           | 1401829      | -            | -         | -          | P          | -         | N         |
|    | 1    | 53           | 3718041      | N            | -         | -          | N          | -         | -         |
|    | 1    | 54           | 1481620      | -            | -         | -          | -          | N         | -         |
|    | 1    | 72           | 1595488      | -            | -         | -          | -          | P         | -         |
|    | 1    | 78           | 341120       | -            | P         | -          | -          | -         | -         |
|    | 1    | 78           | 1218118      | -            | P         | -          | P          | -         | -         |
|    | 1    | 95           | 249851       | -            | P         | -          | -          | -         | -         |
|    | 1    | 96           | 1372113      | -            | -         | -          | P          | -         | -         |
|    | 1    | 124          | 537278       | -            | P         | -          | -          | N         | -         |
|    | 1    | 124          | 692378       | -            | P         | -          | -          | -         | -         |
|    | 1    | 128          | 3859380      | -            | -         | -          | -          | -         | P         |
|    | 1    | 191          | 2271354      | -            | -         | -          | -          | N         | N         |
|    | 1    | 215          | 1505212      | -            | -         | -          | -          | -         | P         |

|   |      |         |   |   |   |   |   |   |
|---|------|---------|---|---|---|---|---|---|
| 1 | 216  | 2220684 | - | - | P | - | - | - |
| 1 | 218  | 379502  | - | P | - | - | - | - |
| 1 | 233  | 4202709 | - | - | - | P | - | - |
| 1 | 238  | 382160  | - | - | P | - | - | - |
| 1 | 258  | 338961  | - | - | - | - | - | N |
| 1 | 259  | 73417   | - | - | - | - | - | P |
| 1 | 259  | 2775110 | - | - | - | - | P | - |
| 1 | 268  | 1684946 | - | - | - | - | - | P |
| 1 | 270  | 365503  | - | N | - | - | - | - |
| 1 | 273  | 222873  | - | - | - | P | - | - |
| 1 | 276  | 962756  | - | - | P | P | - | - |
| 1 | 289  | 1692290 | - | - | N | - | - | - |
| 1 | 297  | 1446547 | - | - | N | - | - | - |
| 1 | 298  | 1303323 | - | - | - | - | P | - |
| 1 | 301  | 3268273 | - | - | - | - | P | - |
| 1 | 301  | 3286057 | - | - | - | - | P | N |
| 1 | 304  | 1251512 | - | - | - | - | P | - |
| 1 | 312  | 562647  | P | - | P | - | - | N |
| 1 | 317  | 226196  | - | - | - | - | - | P |
| 1 | 324  | 80765   | - | - | - | N | - | - |
| 1 | 324  | 768688  | - | - | - | N | - | - |
| 1 | 332  | 827052  | - | - | - | N | - | - |
| 1 | 332  | 970742  | - | - | - | N | - | - |
| 1 | 349  | 890585  | - | - | - | - | - | N |
| 1 | 350  | 40076   | - | - | P | - | - | - |
| 1 | 363  | 50875   | - | - | - | - | P | - |
| 1 | 367  | 342318  | - | N | - | - | - | - |
| 1 | 370  | 1478384 | - | - | - | N | - | - |
| 1 | 375  | 696764  | N | - | - | - | - | N |
| 1 | 381  | 278795  | - | - | - | P | - | - |
| 1 | 381  | 1439904 | - | - | - | - | - | P |
| 1 | 382  | 886856  | P | - | - | - | - | - |
| 1 | 382  | 1574864 | - | - | - | - | - | N |
| 1 | 396  | 929366  | - | - | N | - | - | - |
| 1 | 437  | 201196  | - | - | - | - | - | N |
| 1 | 444  | 198     | - | - | - | - | - | P |
| 1 | 445  | 71025   | - | - | - | - | - | N |
| 1 | 445  | 75680   | - | - | - | - | - | N |
| 1 | 446  | 132042  | - | - | - | N | - | - |
| 1 | 446  | 133260  | - | - | - | N | - | - |
| 1 | 447  | 107385  | - | - | - | - | - | N |
| 1 | 491  | 2551    | - | - | N | - | - | - |
| 1 | 619  | 67319   | - | - | - | - | - | P |
| 1 | 630  | 3069    | N | - | - | - | - | - |
| 1 | 638  | 61005   | - | P | - | - | - | - |
| 1 | 643  | 103647  | - | - | - | N | - | - |
| 1 | 657  | 108426  | - | - | - | - | P | - |
| 1 | 718  | 7366    | - | - | - | - | P | - |
| 1 | 788  | 56371   | - | - | - | - | - | P |
| 1 | 878  | 4969    | - | P | - | - | - | - |
| 1 | 1143 | 15801   | - | - | P | - | - | - |
| 1 | 1217 | 1507    | - | - | - | N | - | P |
| 1 | 1246 | 33567   | - | - | P | - | - | - |
| 1 | 1370 | 3906    | - | - | - | - | P | - |
| 1 | 3418 | 15084   | - | - | - | - | - | P |
| 1 | 4828 | 268     | - | P | P | - | - | - |
| 2 | 42   | 2706312 | N | - | - | - | - | P |
| 2 | 51   | 134372  | - | - | - | P | - | - |
| 2 | 59   | 3480458 | - | - | P | - | - | - |
| 2 | 62   | 242764  | - | - | - | - | N | - |

|   |      |         |   |   |   |   |   |   |
|---|------|---------|---|---|---|---|---|---|
| 2 | 67   | 673351  | P | - | N | P | - | N |
| 2 | 75   | 54057   | - | P | - | - | - | - |
| 2 | 102  | 195820  | - | - | - | - | - | P |
| 2 | 112  | 797257  | P | - | - | - | - | - |
| 2 | 122  | 525086  | - | - | N | - | - | - |
| 2 | 139  | 762099  | N | - | - | - | - | - |
| 2 | 162  | 1342117 | - | - | - | - | - | N |
| 2 | 175  | 2107192 | - | P | - | - | - | - |
| 2 | 177  | 1882795 | - | - | - | - | P | - |
| 2 | 182  | 925721  | - | - | P | - | - | - |
| 2 | 185  | 258819  | - | - | P | - | - | - |
| 2 | 205  | 2650157 | - | - | N | - | - | - |
| 2 | 214  | 2112250 | - | - | - | P | - | - |
| 2 | 233  | 676222  | - | - | P | - | - | - |
| 2 | 233  | 1387404 | - | - | - | N | P | - |
| 2 | 235  | 2941774 | - | - | P | - | - | - |
| 2 | 254  | 173178  | - | - | P | - | - | P |
| 2 | 255  | 791720  | - | - | - | - | - | P |
| 2 | 256  | 209544  | - | P | - | - | - | - |
| 2 | 256  | 4224366 | - | - | - | N | P | - |
| 2 | 260  | 1144836 | N | - | - | - | - | - |
| 2 | 263  | 147829  | - | - | - | - | N | - |
| 2 | 269  | 89605   | - | - | - | - | - | P |
| 2 | 271  | 1507386 | P | - | - | - | - | - |
| 2 | 279  | 1962190 | - | - | N | - | - | - |
| 2 | 282  | 1529946 | N | - | - | - | - | P |
| 2 | 292  | 3561006 | - | - | - | N | - | - |
| 2 | 313  | 1149368 | - | - | - | - | - | N |
| 2 | 315  | 139271  | - | - | - | P | - | - |
| 2 | 315  | 189600  | - | - | - | P | - | - |
| 2 | 333  | 1747729 | P | - | - | - | - | - |
| 2 | 334  | 978337  | - | - | N | P | - | - |
| 2 | 343  | 1707547 | - | - | - | P | - | - |
| 2 | 358  | 163227  | - | - | - | - | - | P |
| 2 | 361  | 618374  | - | - | P | - | - | - |
| 2 | 386  | 853403  | - | - | - | P | - | - |
| 2 | 398  | 2256226 | - | - | P | N | - | - |
| 2 | 408  | 545286  | - | - | - | P | - | - |
| 2 | 412  | 318329  | - | - | - | - | P | - |
| 2 | 414  | 677736  | - | - | - | P | - | - |
| 2 | 414  | 1245535 | - | P | - | - | - | - |
| 2 | 414  | 1462625 | - | - | - | P | - | - |
| 2 | 430  | 1249967 | - | - | - | N | - | - |
| 2 | 431  | 784343  | - | - | - | - | - | N |
| 2 | 439  | 81013   | - | P | - | - | N | N |
| 2 | 445  | 449724  | - | - | - | - | - | P |
| 2 | 447  | 118956  | - | - | - | - | P | - |
| 2 | 447  | 730861  | P | - | - | - | - | - |
| 2 | 448  | 4027821 | - | - | - | P | N | - |
| 2 | 451  | 570671  | - | - | - | - | - | N |
| 2 | 452  | 4558023 | - | - | - | - | N | - |
| 2 | 458  | 305322  | P | - | N | - | - | - |
| 2 | 459  | 1282391 | N | - | - | - | - | - |
| 2 | 490  | 82552   | - | - | - | P | - | - |
| 2 | 870  | 37273   | N | - | - | N | - | P |
| 2 | 919  | 193382  | N | - | - | - | - | - |
| 2 | 1078 | 1570    | - | - | - | - | N | - |
| 2 | 1164 | 81127   | - | - | - | P | - | - |
| 2 | 1486 | 83546   | - | - | - | - | P | - |
| 2 | 1762 | 17787   | - | - | - | P | - | - |

|   |      |         |   |   |   |   |   |   |
|---|------|---------|---|---|---|---|---|---|
| 2 | 1854 | 37860   | - | - | P | - | - | - |
| 2 | 3023 | 6360    | N | - | - | - | - | - |
| 2 | 6746 | 1020    | - | - | N | - | - | N |
| 2 | 8034 | 13132   | - | - | P | - | - | - |
| 3 | 0    | 841465  | N | P | - | - | - | - |
| 3 | 35   | 1680796 | - | - | - | - | P | - |
| 3 | 61   | 1464174 | - | - | P | - | P | - |
| 3 | 93   | 249731  | - | - | - | - | P | - |
| 3 | 104  | 4367326 | - | - | - | - | P | - |
| 3 | 109  | 1363279 | - | - | P | - | - | - |
| 3 | 111  | 2291957 | N | - | - | - | - | - |
| 3 | 126  | 2077698 | - | P | - | - | P | - |
| 3 | 126  | 2119011 | - | P | - | - | P | - |
| 3 | 137  | 836212  | - | P | - | - | - | - |
| 3 | 138  | 994010  | - | - | - | P | - | - |
| 3 | 146  | 1098321 | P | - | - | - | - | P |
| 3 | 154  | 2242952 | - | - | - | - | - | P |
| 3 | 161  | 889864  | - | - | - | - | - | N |
| 3 | 170  | 861681  | - | - | P | - | - | - |
| 3 | 174  | 85819   | P | - | N | - | - | - |
| 3 | 197  | 3697299 | - | - | - | - | - | P |
| 3 | 199  | 8723    | - | - | - | - | N | - |
| 3 | 217  | 1251736 | - | P | - | - | - | - |
| 3 | 222  | 155102  | - | P | - | - | - | - |
| 3 | 224  | 324291  | - | - | - | - | - | P |
| 3 | 225  | 37277   | - | - | - | - | P | - |
| 3 | 225  | 1348164 | - | - | - | - | P | - |
| 3 | 243  | 285139  | P | - | P | - | - | - |
| 3 | 260  | 2537254 | - | - | - | - | N | - |
| 3 | 261  | 985263  | - | P | - | - | - | - |
| 3 | 310  | 1770399 | - | - | - | - | - | N |
| 3 | 314  | 2784883 | - | - | - | - | P | - |
| 3 | 326  | 81458   | N | - | - | - | - | - |
| 3 | 329  | 1389965 | N | - | - | - | - | - |
| 3 | 330  | 1011934 | N | - | P | - | - | - |
| 3 | 346  | 2735663 | - | - | - | - | P | - |
| 3 | 354  | 1772697 | N | - | - | - | - | - |
| 3 | 357  | 217434  | - | P | - | N | - | - |
| 3 | 357  | 2393022 | - | - | - | - | - | N |
| 3 | 367  | 420865  | P | - | - | P | - | - |
| 3 | 371  | 977404  | - | - | - | - | P | - |
| 3 | 387  | 3520928 | - | - | - | N | - | - |
| 3 | 389  | 3860684 | - | - | - | N | - | - |
| 3 | 390  | 2536138 | - | - | - | - | - | N |
| 3 | 393  | 3796683 | - | - | - | - | P | - |
| 3 | 395  | 857252  | P | - | - | - | - | - |
| 3 | 404  | 114318  | N | - | - | P | - | - |
| 3 | 413  | 1777    | - | P | - | - | - | - |
| 3 | 443  | 45497   | - | - | - | - | - | P |
| 3 | 480  | 85679   | N | - | - | - | - | - |
| 3 | 585  | 540185  | P | - | - | - | - | - |
| 3 | 740  | 231703  | P | - | - | - | - | - |
| 3 | 741  | 40177   | P | - | - | - | - | - |
| 3 | 796  | 30330   | - | - | - | - | P | - |
| 3 | 874  | 2261    | - | P | - | P | - | - |
| 3 | 929  | 166870  | - | - | - | - | N | - |
| 3 | 965  | 135521  | - | - | - | P | - | - |
| 3 | 984  | 24602   | - | P | - | N | - | - |
| 3 | 1018 | 128155  | P | - | - | - | - | - |
| 3 | 1033 | 468     | - | - | - | - | - | N |

|   |      |         |   |   |   |   |   |   |
|---|------|---------|---|---|---|---|---|---|
| 3 | 1463 | 763     | - | - | - | - | P | - |
| 3 | 1483 | 4552    | N | - | - | - | - | - |
| 3 | 1580 | 17821   | - | - | - | - | P | - |
| 4 | 0    | 381612  | - | - | N | - | - | - |
| 4 | 1    | 91026   | N | - | - | - | - | - |
| 4 | 4    | 405721  | - | - | - | - | - | N |
| 4 | 4    | 597847  | - | - | - | N | - | - |
| 4 | 5    | 659871  | - | - | - | P | - | - |
| 4 | 6    | 875072  | N | - | - | - | - | - |
| 4 | 15   | 1005633 | - | - | - | - | - | N |
| 4 | 15   | 1523425 | - | - | - | P | - | - |
| 4 | 17   | 2238220 | - | - | - | - | - | N |
| 4 | 17   | 3632032 | - | - | - | P | - | - |
| 4 | 22   | 123626  | - | - | - | P | - | - |
| 4 | 26   | 871344  | - | P | - | - | - | N |
| 4 | 27   | 178274  | - | P | - | - | - | - |
| 4 | 27   | 2697932 | - | P | - | - | - | - |
| 4 | 29   | 87889   | - | N | - | - | - | - |
| 4 | 59   | 21414   | - | - | - | P | - | - |
| 4 | 60   | 1569690 | - | - | - | - | - | P |
| 4 | 60   | 2705358 | - | - | P | - | - | - |
| 4 | 66   | 158371  | N | - | - | - | - | - |
| 4 | 77   | 2113411 | - | P | - | - | - | - |
| 4 | 80   | 777434  | - | - | - | N | - | N |
| 4 | 85   | 1132651 | - | - | - | - | - | P |
| 4 | 103  | 1133697 | - | - | - | N | - | - |
| 4 | 103  | 1145145 | - | P | - | - | - | - |
| 4 | 108  | 2990908 | - | P | - | - | - | - |
| 4 | 110  | 164361  | - | - | - | - | - | N |
| 4 | 127  | 1864609 | - | - | - | - | P | - |
| 4 | 145  | 973634  | N | - | - | - | - | - |
| 4 | 145  | 1159821 | - | - | - | P | - | - |
| 4 | 155  | 685114  | - | P | N | - | - | - |
| 4 | 175  | 668147  | - | - | - | - | P | - |
| 4 | 228  | 4187183 | - | P | - | - | - | - |
| 4 | 232  | 58588   | - | - | - | - | - | P |
| 4 | 244  | 1367124 | - | - | - | P | - | - |
| 4 | 251  | 828774  | - | - | - | - | N | - |
| 4 | 251  | 909279  | N | - | - | - | - | - |
| 4 | 273  | 526260  | - | - | P | - | - | - |
| 4 | 281  | 4624964 | - | - | - | P | - | - |
| 4 | 288  | 1286334 | P | - | - | - | - | - |
| 4 | 290  | 184903  | P | - | - | - | - | - |
| 4 | 290  | 278523  | - | P | - | - | - | - |
| 4 | 293  | 608201  | P | - | - | - | - | - |
| 4 | 298  | 71438   | - | - | N | - | - | - |
| 4 | 479  | 48398   | - | - | - | P | - | - |
| 4 | 525  | 6048    | - | - | - | N | - | - |
| 4 | 541  | 12711   | - | - | - | P | - | N |
| 4 | 657  | 33346   | - | - | - | N | - | - |
| 4 | 657  | 127489  | - | - | - | N | - | - |
| 4 | 845  | 12122   | - | - | - | - | - | P |
| 4 | 902  | 32609   | P | - | - | P | - | - |
| 4 | 1826 | 196     | - | - | - | P | - | - |
| 5 | 5    | 381276  | - | - | - | - | P | - |
| 5 | 20   | 384808  | P | - | - | - | - | - |
| 5 | 42   | 309633  | - | - | - | P | - | - |
| 5 | 43   | 386379  | - | - | - | P | - | - |
| 5 | 43   | 1194068 | - | - | - | P | - | - |
| 5 | 46   | 1276171 | - | - | P | - | - | - |

|    |      |         |   |   |   |   |   |   |
|----|------|---------|---|---|---|---|---|---|
| 5  | 50   | 1376047 | - | - | - | - | P | - |
| 5  | 63   | 1205307 | - | - | - | - | - | N |
| 5  | 76   | 2235181 | N | - | - | - | - | - |
| 5  | 76   | 2336491 | - | - | - | P | - | - |
| 5  | 110  | 4302709 | N | - | - | - | - | - |
| 5  | 118  | 1052684 | - | - | - | - | N | - |
| 5  | 124  | 263439  | - | - | - | P | - | - |
| 5  | 129  | 3511565 | N | - | - | - | - | - |
| 5  | 130  | 255772  | - | - | - | P | - | - |
| 5  | 144  | 18312   | - | N | - | P | - | - |
| 5  | 146  | 1157296 | - | - | - | - | N | - |
| 5  | 152  | 2544045 | - | - | P | - | - | P |
| 5  | 152  | 2986480 | - | - | - | P | - | - |
| 5  | 164  | 279635  | - | - | - | N | - | - |
| 5  | 169  | 1680844 | - | P | - | - | - | - |
| 5  | 170  | 174412  | - | - | - | P | - | - |
| 5  | 184  | 187135  | - | - | - | N | - | - |
| 5  | 318  | 91198   | - | - | - | N | - | - |
| 5  | 464  | 46402   | - | - | - | P | - | - |
| 5  | 507  | 10806   | - | - | - | - | N | - |
| 5  | 556  | 137196  | - | - | N | - | - | - |
| 5  | 600  | 77260   | - | P | - | - | - | - |
| 5  | 647  | 62985   | - | - | - | - | - | N |
| 5  | 1030 | 2681    | - | - | - | - | - | P |
| 5  | 2760 | 5241    | - | - | - | - | N | - |
| 6  | 69   | 440077  | - | - | - | - | N | - |
| 6  | 82   | 187751  | - | - | - | P | - | - |
| 6  | 94   | 165143  | - | - | - | P | - | - |
| 6  | 99   | 76857   | - | - | - | N | - | - |
| 6  | 106  | 775062  | - | - | - | P | - | - |
| 6  | 121  | 1922084 | - | - | - | P | - | - |
| 6  | 123  | 280634  | - | - | N | - | - | - |
| 6  | 130  | 148254  | - | N | - | - | - | N |
| 6  | 132  | 634199  | - | - | P | - | - | P |
| 6  | 139  | 716540  | - | - | - | - | P | - |
| 6  | 141  | 1847488 | - | - | - | - | N | P |
| 6  | 145  | 2016368 | - | - | P | - | - | - |
| 6  | 145  | 2409985 | - | - | N | - | - | - |
| 6  | 146  | 455023  | - | - | - | - | - | N |
| 6  | 156  | 2519435 | - | - | - | - | N | - |
| 6  | 158  | 1961285 | - | - | - | - | - | N |
| 6  | 158  | 3474996 | - | - | - | N | - | - |
| 6  | 169  | 431267  | - | - | P | - | - | - |
| 6  | 176  | 1475957 | - | - | - | - | - | N |
| 6  | 176  | 1633242 | - | - | - | P | - | - |
| 6  | 209  | 25742   | - | - | - | - | - | N |
| 6  | 292  | 151856  | - | N | - | - | - | - |
| 6  | 514  | 1844    | - | P | - | - | - | - |
| 6  | 548  | 7882    | P | - | - | - | - | - |
| 6  | 705  | 6615    | - | P | - | - | - | - |
| 6  | 728  | 9316    | N | - | - | - | - | - |
| 6  | 729  | 1211    | - | P | - | - | - | - |
| 6  | 778  | 50766   | - | - | - | P | - | N |
| 6  | 1519 | 6549    | - | - | - | - | P | P |
| NA | 0    | 2       | P | - | - | - | - | - |
| NA | 0    | 11      | N | - | - | - | - | - |
| NA | 0    | 18      | P | - | - | - | - | N |
| NA | 0    | 18      | - | - | N | P | - | - |
| NA | 0    | 24      | - | N | - | - | - | - |
| NA | 0    | 33      | - | - | - | P | - | - |

---

|    |   |    |   |   |   |   |   |   |
|----|---|----|---|---|---|---|---|---|
| NA | 0 | 34 | - | - | P | - | - | - |
| NA | 0 | 37 | - | - | N | - | - | - |
| NA | 0 | 39 | - | - | - | - | - | N |
| NA | 0 | 47 | - | - | - | - | N | - |
| NA | 0 | 51 | - | - | P | - | - | - |
| NA | 0 | 52 | - | - | - | P | - | - |
| NA | 0 | 58 | - | - | - | - | N | - |
| NA | 0 | 86 | - | - | - | - | - | N |
| NA | 0 | 90 | - | - | - | N | - | - |
| NA | 0 | 91 | - | - | - | - | - | P |

---
