# Supplementary material for: Detecting Selection on Temporal and Spatial Scales: A Genomic Time-Series Assessment of Selective Responses to Devil Facial Tumor Disease
Source: PubMed Central journal article supplement (PMC4773136; doi:10.1371/journal.pone.0147875), 2016-03-01
Supplement: pone.0147875.s004.pdf [file pone.0147875.s004.pdf]

**SI 4.** Overview of SNPs under selection detected with demographic and time-series methods. SNPs under selection for each year (1999, 2004, 2009 and 2013) as identified with BAYESCAN and in individual populations assuming a) a small ( $N_e=50$ ) and b) a large ( $N_e=500$ ) effective population size identified with WFABC. For each SNP chromosome (Chr.), super-contig and position in super-contig are given. Direction of selection is given as positive (P) and negative (N). Only SNPs identified as being under selection with both methods are included.

| Chr. | Super-contig | SNP position |         |      |      |      | Woolnorth | Arthur River | Narawntapu | Mt William | Freycinet | Forestier |
|------|--------------|--------------|---------|------|------|------|-----------|--------------|------------|------------|-----------|-----------|
|      |              |              | 1999    | 2004 | 2009 | 2013 |           |              |            |            |           |           |
| a)   |              |              |         |      |      |      |           |              |            |            |           |           |
|      | 2            | 673351       | -       | -    | P    | -    | N         | N            | -          | N          | N         | N         |
|      | 5            | 1194068      | -       | -    | P    | -    | -         | -            | P          | -          | -         | -         |
| b)   |              |              |         |      |      |      |           |              |            |            |           |           |
|      | 1            | 2            | 960133  | -    | P    | P    | -         | -            | -          | P          | -         | -         |
|      | 1            | 5            | 3478545 | -    | P    | -    | P         | -            | -          | P          | -         | P         |
|      | 1            | 12           | 876195  | -    | P    | P    | -         | -            | N          | -          | -         | -         |
|      | 1            | 34           | 2090729 | -    | -    | P    | -         | -            | -          | N          | -         | -         |
|      | 1            | 54           | 1481620 | -    | -    | -    | P         | -            | -          | -          | N         | -         |
|      | 1            | 124          | 537278  | -    | -    | -    | P         | P            | -          | -          | N         | -         |
|      | 1            | 259          | 73417   | P    | -    | -    | P         | -            | -          | -          | -         | P         |
|      | 1            | 259          | 2775110 | P    | P    | P    | P         | -            | -          | -          | P         | -         |
|      | 1            | 289          | 1692290 | P    | P    | P    | P         | -            | -          | N          | -         | -         |
|      | 1            | 297          | 1446547 | -    | -    | -    | P         | -            | -          | N          | -         | -         |
|      | 1            | 375          | 696764  | -    | -    | P    | P         | -            | N          | -          | -         | N         |
|      | 1            | 381          | 278795  | -    | -    | -    | P         | -            | -          | -          | P         | -         |
|      | 1            | 445          | 71025   | -    | P    | P    | P         | -            | -          | -          | -         | N         |
|      | 1            | 445          | 75680   | -    | P    | P    | P         | -            | -          | -          | -         | N         |
|      | 1            | 446          | 132042  | -    | -    | -    | P         | -            | -          | -          | N         | -         |
|      | 1            | 446          | 133260  | -    | -    | -    | P         | -            | -          | -          | N         | -         |
|      | 1            | 630          | 3069    | P    | P    | P    | P         | -            | N          | -          | -         | -         |
|      | 1            | 643          | 103647  | -    | P    | P    | P         | -            | -          | N          | -         | -         |
|      | 1            | 788          | 56371   | -    | -    | -    | P         | -            | -          | -          | -         | P         |
|      | 1            | 1246         | 33567   | -    | -    | P    | P         | -            | -          | P          | -         | -         |
|      | 1            | 1370         | 3906    | -    | -    | P    | P         | -            | -          | -          | P         | -         |
|      | 2            | 67           | 673351  | -    | -    | P    | -         | -            | P          | N          | P         | N         |
|      | 2            | 122          | 525086  | -    | -    | P    | -         | -            | -          | N          | -         | -         |
|      | 2            | 185          | 258819  | -    | -    | P    | -         | -            | -          | P          | -         | -         |
|      | 2            | 233          | 676222  | -    | -    | P    | -         | -            | -          | P          | -         | -         |
|      | 2            | 235          | 2941774 | -    | -    | P    | P         | -            | -          | P          | -         | -         |
|      | 2            | 254          | 173178  | -    | -    | P    | P         | -            | -          | P          | -         | P         |
|      | 2            | 256          | 209544  | -    | -    | P    | -         | P            | -          | -          | -         | -         |
|      | 2            | 279          | 1962190 | P    | -    | -    | -         | -            | -          | N          | -         | -         |
|      | 2            | 313          | 1149368 | -    | -    | P    | -         | -            | -          | -          | -         | N         |
|      | 2            | 451          | 570671  | -    | -    | P    | -         | -            | -          | -          | -         | N         |
|      | 3            | 93           | 249731  | P    | P    | P    | P         | -            | -          | -          | P         | -         |
|      | 3            | 109          | 1363279 | -    | P    | -    | -         | -            | -          | P          | -         | -         |
|      | 3            | 137          | 836212  | -    | -    | P    | -         | P            | -          | -          | -         | -         |
|      | 3            | 260          | 2537254 | -    | -    | P    | -         | -            | -          | -          | N         | -         |
|      | 3            | 310          | 1770399 | -    | -    | P    | P         | -            | -          | -          | -         | N         |
|      | 3            | 314          | 2784883 | -    | -    | P    | -         | -            | -          | -          | P         | -         |
|      | 3            | 357          | 217434  | -    | -    | P    | -         | P            | -          | N          | -         | -         |

|   |      |         |   |   |   |   |   |   |   |   |   |   |
|---|------|---------|---|---|---|---|---|---|---|---|---|---|
| 3 | 390  | 2536138 | P | - | P | P | - | - | - | - | - | N |
| 3 | 1483 | 4552    | - | - | P | - | - | N | - | - | - | - |
| 4 | 4    | 597847  | - | - | P | - | - | - | - | N | - | - |
| 4 | 15   | 1005633 | - | - | P | P | - | - | - | - | - | N |
| 4 | 15   | 1523425 | - | - | P | P | - | - | - | P | - | - |
| 4 | 17   | 3632032 | - | P | P | - | - | - | - | P | - | - |
| 4 | 60   | 1569690 | - | - | - | P | - | - | - | - | - | P |
| 4 | 77   | 2113411 | - | P | P | P | P | - | - | - | - | - |
| 4 | 103  | 1133697 | - | P | P | - | - | - | - | N | - | - |
| 4 | 127  | 1864609 | P | - | - | - | - | - | - | - | P | - |
| 4 | 155  | 685114  | - | - | - | P | P | - | N | - | - | - |
| 4 | 251  | 828774  | - | P | - | - | - | - | - | - | N | - |
| 4 | 298  | 71438   | - | - | P | P | - | - | N | - | - | - |
| 4 | 657  | 33346   | - | - | P | P | - | - | - | N | - | - |
| 4 | 657  | 127489  | - | - | P | P | - | - | - | N | - | - |
| 4 | 1826 | 196     | - | P | - | P | - | - | - | P | - | - |
| 5 | 43   | 1194068 | - | - | P | - | - | - | - | P | - | - |
| 5 | 50   | 1376047 | - | - | - | P | - | - | - | - | P | - |
| 5 | 63   | 1205307 | - | - | - | P | - | - | - | - | - | N |
| 5 | 464  | 46402   | - | - | P | - | - | - | - | P | - | - |
| 6 | 82   | 187751  | - | - | P | P | - | - | - | P | - | - |
| 6 | 94   | 165143  | - | - | P | P | - | - | - | P | - | - |
| 6 | 106  | 775062  | - | - | - | P | - | - | - | P | - | - |
| 6 | 145  | 2409985 | - | P | - | P | - | - | N | - | - | - |
| 6 | 156  | 2519435 | - | - | P | P | - | - | - | - | N | - |
| 6 | 728  | 9316    | - | - | P | - | - | N | - | - | - | - |
