# Supplementary material for: Detecting Selection on Temporal and Spatial Scales: A Genomic Time-Series Assessment of Selective Responses to Devil Facial Tumor Disease
Source: PubMed Central journal article supplement (PMC4773136; doi:10.1371/journal.pone.0147875), 2016-03-01
Supplement: pone.0147875.s005.pdf [file pone.0147875.s005.pdf]

**SI 5.** SNPs under selection at each year detected with BAYESCAN assuming prior odds of 100. For each SNP chromosome (chr.), super-contig, SNP position in super-contig and direction of selection, which for all SNPs are positive (P).

| <b>Chr.</b> | <b>Super-contig</b> | <b>SNP position</b> | <b>1999</b> | <b>2004</b> | <b>2009</b> | <b>2013</b> |
|-------------|---------------------|---------------------|-------------|-------------|-------------|-------------|
| 1           | 5                   | 3478545             | -           | P           | -           | P           |
| 1           | 24                  | 2439039             | -           | -           | -           | P           |
| 1           | 30                  | 456063              | -           | -           | -           | P           |
| 1           | 103                 | 63790               | -           | -           | P           | -           |
| 1           | 239                 | 2175315             | -           | -           | P           | -           |
| 1           | 259                 | 53959               | -           | -           | -           | P           |
| 1           | 259                 | 73417               | P           | -           | -           | P           |
| 1           | 259                 | 2775110             | -           | -           | -           | P           |
| 1           | 281                 | 786550              | P           | -           | -           | P           |
| 1           | 281                 | 1194959             | P           | -           | -           | P           |
| 1           | 289                 | 1692290             | -           | -           | P           | P           |
| 1           | 297                 | 1446547             | -           | -           | -           | P           |
| 1           | 375                 | 696764              | -           | -           | P           | -           |
| 1           | 381                 | 278795              | -           | -           | -           | P           |
| 1           | 386                 | 537974              | -           | -           | -           | P           |
| 1           | 445                 | 71025               | -           | -           | P           | P           |
| 1           | 445                 | 75680               | -           | -           | P           | P           |
| 1           | 630                 | 3069                | -           | -           | P           | P           |
| 1           | 643                 | 103647              | -           | -           | -           | P           |
| 1           | 788                 | 56371               | -           | -           | -           | P           |
| 1           | 1246                | 33567               | -           | -           | P           | P           |
| 2           | 13                  | 8347                | -           | -           | P           | P           |
| 2           | 67                  | 673351              | -           | -           | P           | -           |
| 2           | 231                 | 725912              | -           | -           | -           | P           |
| 2           | 233                 | 676222              | -           | -           | P           | -           |
| 2           | 235                 | 2941774             | -           | -           | P           | P           |
| 2           | 241                 | 412933              | -           | -           | -           | P           |
| 2           | 253                 | 2410314             | -           | -           | -           | P           |
| 2           | 254                 | 173178              | -           | -           | P           | P           |
| 2           | 382                 | 421209              | -           | -           | P           | P           |
| 2           | 449                 | 170227              | -           | -           | -           | P           |
| 2           | 569                 | 60916               | -           | -           | P           | P           |
| 2           | 658                 | 62646               | -           | -           | -           | P           |
| 2           | 1150                | 21386               | -           | -           | -           | P           |
| 3           | 93                  | 249731              | -           | -           | P           | P           |
| 3           | 94                  | 718106              | -           | -           | P           | P           |
| 3           | 94                  | 779170              | -           | -           | P           | P           |
| 3           | 109                 | 1314065             | -           | P           | P           | -           |
| 3           | 109                 | 1363279             | -           | P           | -           | -           |
| 3           | 310                 | 1770399             | -           | -           | P           | P           |

---

|    |      |         |   |   |   |   |
|----|------|---------|---|---|---|---|
| 3  | 387  | 2836116 | - | - | P | - |
| 3  | 388  | 3437445 | - | - | P | - |
| 3  | 390  | 2536138 | - | - | P | P |
| 3  | 760  | 37586   | - | - | P | P |
| 3  | 3680 | 908     | - | - | P | - |
| 4  | 15   | 1005633 | - | - | P | P |
| 4  | 17   | 3632032 | - | - | P | - |
| 4  | 23   | 331080  | - | - | - | P |
| 4  | 32   | 54662   | - | - | P | P |
| 4  | 60   | 1569690 | - | - | - | P |
| 4  | 61   | 345278  | - | - | - | P |
| 4  | 77   | 2113411 | - | P | P | P |
| 4  | 87   | 1670726 | - | - | P | - |
| 4  | 103  | 1133697 | - | P | - | - |
| 4  | 155  | 685114  | - | - | - | P |
| 4  | 181  | 101628  | - | P | - | - |
| 4  | 237  | 956702  | - | - | P | - |
| 4  | 276  | 1861899 | - | - | - | P |
| 4  | 281  | 706685  | - | - | P | - |
| 4  | 302  | 548044  | - | - | P | P |
| 4  | 657  | 33346   | - | - | - | P |
| 4  | 657  | 127489  | - | - | P | P |
| 4  | 1078 | 47296   | - | - | - | P |
| 5  | 10   | 76100   | - | - | P | P |
| 5  | 55   | 1312293 | - | - | - | P |
| 5  | 68   | 250972  | - | P | P | P |
| 5  | 82   | 124066  | - | - | P | P |
| 5  | 157  | 1444854 | - | - | P | P |
| 5  | 175  | 242072  | - | - | - | P |
| 5  | 182  | 227713  | - | P | - | P |
| 5  | 368  | 180120  | - | - | P | - |
| 5  | 374  | 40069   | - | - | - | P |
| 5  | 447  | 7205    | - | - | P | P |
| 5  | 523  | 19999   | - | - | - | P |
| 5  | 625  | 3774    | - | - | P | P |
| 6  | 83   | 554595  | - | P | - | - |
| 6  | 94   | 165143  | - | - | - | P |
| 6  | 121  | 808041  | - | - | P | - |
| 6  | 145  | 2409985 | - | P | - | P |
| 6  | 156  | 2519435 | - | - | P | - |
| 6  | 167  | 3269766 | - | - | - | P |
| 6  | 168  | 390402  | - | - | P | - |
| NA | 0    | 2       | - | - | - | P |
| NA | 0    | 18      | - | P | P | P |
| NA | 0    | 47      | - | P | - | - |
| NA | 0    | 91      | - | - | - | P |

---
